# Supplementary material for: Brassinosteroids Regulate OFP1, a DLT Interacting Protein, to Modulate Plant Architecture and Grain Morphology in Rice
Source: PubMed Central journal article supplement (PMC5623909; doi:10.3389/fpls.2017.01698), 2017-09-27
Supplement: Table_1.pdf [file Table_1.pdf]

**Supplemental Table 1. Primers used for vector constructions.**

| Name                        | Forward (5'-3')                                    | Reverse (5'-3')                                   | vector                      |
|-----------------------------|----------------------------------------------------|---------------------------------------------------|-----------------------------|
| <i>OFF1-AD</i>              | <u>CATCGATACGGGATCCATATGGCG</u><br>ATGGATCATCGT    | <u>TCATCTGCAGCTCGAGCTAGCCG</u><br>CCATGGAGGAC     | <i>pGADT7</i>               |
| <i>DLT-AD</i>               | <u>GAATTCATGTTGGCGGGTTGCTCG</u><br>TTCTCGT         | <u>TCTAGATTAGCTTTGCTGAGAATG</u><br>TGATGCTG       | <i>pGADT7</i>               |
| <i>OFF1-BD</i>              | <u>CATGGAGGCCGAATTCATGGCGAT</u><br>GGATCATCGT      | <u>GCAGGTCGACGGATCCCTAGCC</u><br>GCCATGGAGGAC     | <i>pGBKT7</i>               |
| <i>DLT-BD</i>               | <u>GAATTCATGTTGGCGGGTTGCTCG</u><br>TTCTCGT         | <u>CTGCAGTTAGCTTTGCTGAGAAT</u><br>GTGATGCTG       | <i>pGBKT7</i>               |
| <i>GSK2-BD</i>              | <u>GAATTCAGCTTTGCCACATGGAC</u><br>CAGCCGGC         | <u>CTGCAGTTAGCTCCAGTATTGAA</u><br>G               | <i>pGBKT7</i>               |
| <i>VN-OFP1</i>              | <u>GCCTACTAGTGGATCCATGGCGAT</u><br>GGATCATCGT      | <u>GAGCGGTACCCTCGAGCTAGCC</u><br>GCCATGGAGGAC     | <i>pVYNE(R)</i>             |
| <i>VN-DLT</i>               | <u>GCCTACTAGTGGATCCATGTTGGC</u><br>GGGTTGCTCG      | <u>GAGCGGTACCCTCGAGTTAGCTT</u><br>TGCTGAGAATG     | <i>pVYNE(R)</i>             |
| <i>VC-OFP1</i>              | <u>GCCTACTAGTGGATCCATGGCGAT</u><br>GGATCATCGT      | <u>GAGCGGTACCCTCGAGCTAGCC</u><br>GCCATGGAGGAC     | <i>pVYCE(R)</i>             |
| <i>GSK2-NLuc</i>            | <u>TCGGTACCCGGGATCCATGGACCA</u><br>GCCGGCGCCG      | <u>ACGAGATCTGGTCGACGCTCCCA</u><br>GTATTGAAGAA     | <i>pCAMBIA1300-35S-NLuc</i> |
| <i>CLuc-OFP1</i>            | <u>ACGCGTCCCGGGGCGGTACCATG</u><br>GCGATGGATCATCGT  | <u>TCCATTTGTTGGATCCCTAGCCG</u><br>CCATGGAGGAC     | <i>pCAMBIA1300-35S-CLuc</i> |
| <i>CLuc-GSK2</i>            | <u>ACGCGTCCCGGGGCGGTACCATG</u><br>GACCAGCCGGCGCCG  | <u>TCCATTTGTTGGATCCCTAGCTCC</u><br>CAGTATTGAA     | <i>pCAMBIA1300-35S-CLuc</i> |
| <i>OFF1p-GUS</i>            | <u>TACGCCAAGCTTGGCTGCAGGATC</u><br>TCTACGGTGAAGGAT | <u>GAATTCGCGGGGATCCTGGCAGC</u><br>TACCACCAGTA     | <i>pCAMBIA2391 Z</i>        |
| <i>OFF1-CRISPR/CAS9-U3m</i> | <u>GGCAGCGATGGATCATCGTGGTG</u><br>G                | <u>AAACCCACCACGATGATCCATCG</u><br>C               | <i>pYLCRISPR/Cas9-MH</i>    |
| <i>OFF1-OE</i>              | <u>CGGTACCCGGGGATCCGATCTCTA</u><br>CGGTGAAGGAT     | <u>GCAGGTCGACTCTAGAAAAGGTG</u><br>CACACTGATCA     | <i>pCAMBIA2300</i>          |
| <i>DLT-RFP</i>              | <u>TTTGGAGAGGACAGGGTACCATGT</u><br>TGGCGGGTTGCTCG  | <u>TCGGAGGAGGCCATGGTACCCTG</u><br>TTGCTGAGAATGTGA | <i>pCAMBIA2300-35S-RFP</i>  |
| <i>OFF1-GFP</i>             | <u>GGGTACCCGGGGATCCATGGCGAT</u><br>GGATCATCGT      | <u>TAGTGTGACTCTAGAGCCGCCA</u><br>TGGAGGACGAC      | <i>pCAMBIA2300-35S-GFP</i>  |
| <i>OFF1-FLAG</i>            | <u>GAGGCGCGCCGTCGACATGGCGA</u><br>TGGATCATCGT      | <u>TGTAGTCCATGTCGACGCCGCCA</u><br>TGGAGGACGAC     | <i>pCAMBIA1300-35S-FLAG</i> |

**Supplemental Table 2.** Primers used for quantitative PCR analyses.

| Name                       | Forward (5'-3')                    | Reverse (5'-3')                    |
|----------------------------|------------------------------------|------------------------------------|
| <b>For qRT-PCR:</b>        |                                    |                                    |
| <i>UBQ</i>                 | GAGCCTCTGTTCGTCAAGTA               | ACTCGATGGTCCATTAAACC               |
| <i>OFP1</i>                | AGCAGCTGCGTTGACACGT                | GACGACCATCTCCACCAT                 |
| <i>GA2ox-3</i>             | TGGTGGCCAACAGCCTAAAG               | TGGTGCAATCCTCTGTGCTAAC             |
| <i>GA20ox-2</i>            | CCAATTTGGACCCTACCGC                | GAGAGAAGCCCAACCCAACC               |
| <i>GA3ox-2</i>             | TCCTCCTTCTTCTCCAAGCTCAT            | GAAACTCCTCCATCACGTCACA             |
| <i>D2</i>                  | AGCTGCCTGGCACTAGGCTCTACAGATC<br>AC | ATGTTGTCGGAGATGAGCTCGTCGGTGA<br>GC |
| <i>D11</i>                 | TTGGGTCATGGCATGGCAAGAGCAAGGA       | TTGTTGCTGGAGCCAGCATTCTCCTCT        |
| <i>DWARF</i>               | ATGGTGTGGTGGCGATTGGGGTGGTTG        | ATGTTGTTCCGCCCCAGGATGTCCAGCA       |
| <b>For ChIP-qPCR:</b>      |                                    |                                    |
| <i>OFP1</i> P1             | ACCCTTGTCAATCCCTCTT                | CGGAGTAGGGGTAGGTATG                |
| <i>OFP1</i> P2             | GCTTGATGGGAAGGTGACT                | TTTTGGGACGGAGGGATT                 |
| <i>OFP1</i> P3             | ACGCGTACTCAATGGTTG                 | TGTGTACGCGTACGCGCACT               |
| <i>DTL</i> (coding region) | CCTGGCGTTCGAGTTCCA                 | TGGCGAGGACGCAGTTCA                 |
| <i>ACTIN1</i> (intron)     | TGGCATCTCTCAGCACATTC               | GGCAAGCAACATTGTAAGCA               |
